# Supplementary material for: Health Service Utilization among Syrian Refugees with Chronic Health Conditions in Jordan
Source: PLoS One. 2016 Apr 13;11(4):e0150088. doi: 10.1371/journal.pone.0150088 (PMC4830531; doi:10.1371/journal.pone.0150088)
Supplement: S3 Table — (XLSX) [file pone.0150088.s004.xlsx]

## Sheet: Sheet1
S3 Table. Out-of-Pocket Consultation Payment for Most Recent Chronic Disease Care Among Syrian Refugees in Jordan by Sector*
	All NCDs (n=1,363)	Hypertension (n=408)	Cardiovascular Disease (n=190)	Diabetes (n=250)	Chronic Resp. Disease (n=213)	Arthritis (n=302)	p-value for comparison by condition
	(95 CI)	(95 CI)	(95 CI)	(95 CI)	(95 CI)	(95 CI)
Public Facilities
Median	0	0	0	0	0	0
Mean	4.4 (1.4,7.5)	3.2 (0,6.8)	4.2 (1.7,6.8)	9.6 (0,22.8)	2.0 (0.7,3.1)	3.0 (0.6,5.2)	0.377
% paying for provider visit***	14.7 (11.6,18.5)	14.0 (10.1,19.1)	17.7 (10.7,27.9)	16.3 (10.4,24.6)	12.1 (7.3,19.7)	14.5 (9.1,22.4)	0.783
Private Facilities
Median	10	14	14	14	11	10
Mean	54.6 (12.4,96.9)	56.8 (0,138.3)	94.3 (0,237.4)	103.9 (0,272.8)	15.4 (10.9,19.9)	20.3 (9.3,31.3)	0.461
% paying for provider visit***	68.4 (61.7,74.5)	68.9 (58.7,77.6)	59.6 (46.5,71.6)	63.8 (50.1,75.6)	70.2 (57.2,80.6)	76.0 (64.7,84.5)	0.24
Charity/NGO Facilities
Median	0	0	0	0	0	0
Mean	1.7 (0.3,3.0)	1.7 (0.3,1.7)	0.4 (0,1.0)	1.4 (0,2.8)	2.8 (0,5.9)	3.1 (0,7.1)	0.298
% paying for provider visit***	19.5 (11.1,31.8)	19.5 (8.5,30.0)	12.5 (2.9,40.5)	14.3 (5.7,31.5)	31.8 (15.5,54.3)	26.2 (13.8,43.9)	0.198
* all cost figures are presented in USD ** as a percent of those seeking care in Jordan for condition *** as a percent of those seeking care in Jordan in this sector for condition
